# Supplementary material for: 4-Pyridoxic Acid/Pyridoxine Ratio in Patients with Type 2 Diabetes is Related to Global Cardiovascular Risk Scores
Source: MDPI journal article supplement (doi:10.3390/diagnostics9010028), 2019-03-06
Supplement: s1 [file s1]

### Supplemental Tables

**Supplemental Table 1.** Risk scores for cardiovascular hospitalization in patients with type 2 diabetes based on common risk factors [see Yu et al (1) for details on the multivariate model].

| Constant                                               | -3.80246                |
|--------------------------------------------------------|-------------------------|
| <i>Risk factor</i>                                     | <i>Beta Coefficient</i> |
| Sex (men = 1; women = 0)                               | 0.2289                  |
| Age $\geq 70$ years (1 = yes; 0 = no)                  | 0.8159                  |
| HbA1c $\geq 7.4\%$ (1 = yes; 0 = no)                   | -0.0397                 |
| (BMI/10) <sup>-2</sup>                                 | - 1.8538                |
| (BMI/10) <sup>0.5</sup>                                | + 0.9606                |
| (Systolic BP/100) <sup>2</sup>                         | -0.4030                 |
| (Systolic BP/100) <sup>2</sup> * Ln(systolic BP/100)   | 0.9662                  |
| (Diastolic BP/100) <sup>2</sup>                        | 0.474                   |
| (Diastolic BP/100) <sup>2</sup> * Ln(diastolic BP/100) | 0.2724                  |
| Ln(total cholesterol/10)                               | 0.5147                  |
| (Total cholesterol/10) <sup>0.5</sup>                  | -1.0580                 |
| Ln(HDL-C)                                              | 0.0734                  |
| (HDL-C/10) <sup>3</sup>                                | -0.0238                 |
| (LDL-C/10) <sup>0.5</sup>                              | -0.5563                 |
| ln(LDL-C/10)*(LDL-C/10) <sup>0.5</sup>                 | -0.8316                 |

The risk for cardiovascular hospitalization =  $1 / (1 + e^{-\text{risk score}})$ .

Plasma concentrations of lipids were entered in SI (mmol/L) units.

BMI, body mass index; BP, blood pressure; HbA1c, glycated hemoglobin; HDL-C, high density lipoprotein cholesterol; LDL-C, low density lipoprotein cholesterol.

Supplemental Table 2. Traditional risk factors in the healthy subjects compared to the patients with type 2 diabetes.

|                          | All patients<br>N = 122 | Control subjects<br>N = 34 | p      |
|--------------------------|-------------------------|----------------------------|--------|
| Men, n (%)               | 60 (50%)                | 24 (29%)                   | 0.033  |
| Age, years               | 69.9 (9.1)              | 49 (9)                     | <0.001 |
| BMI, kg/m <sup>2</sup>   | 29.8 (4.1)              | 25.1 (4.2)                 | <0.001 |
| Systolic BP, mmHg        | 138 (15)                | 124 (13)                   | <0.001 |
| Diastolic BP, mmHg       | 82 (7)                  | 80 (7)                     | 0.254  |
| Cystatin-C, µg/ml        | 1.03 (0.46)             | 0.35 (1.03)                | <0.001 |
| CRP, µg/ml               | 5.7 (12.5)              | 2.2 (4.6)                  | 0.120  |
| sVCAM-1, ng/ml           | 531 (236)               | 411 (138)                  | 0.005  |
| Total cholesterol, mg/dl | 197 (37)                | 222 (34)                   | 0.001  |
| HDL-C, mg/dl             | 49 (14)                 | 65 (19)                    | <0.001 |
| LDL-C, mg/dl             | 125 (34)                | 142 (28)                   | 0.009  |
| Triglycerides, mg/dl     | 155 (81)                | 95 (37)                    | <0.001 |
| Framingham risk scores   | 35.2 (11.7)             | 7.9 (5.5)                  | <0.001 |
| PROCAM score             | 60.3 (11.4)             | 28.4 (10.4)                | <0.001 |

Data are mean (SD).

P values are according to ANOVA test (log transformed values).

BMI, body mass index; BP, blood pressure; CRP, C-reactive protein; HDL-C, high density lipoprotein cholesterol; LDL-C, low density lipoprotein cholesterol; sVCAM-1, soluble vascular cell adhesion molecule 1.

**Supplemental Table 3.** Correlations of PAr and 4-pyridoxic acid/pyridoxine ratio with single risk factors (only continuous variables) in 122 patients with type 2 diabetes.

| Variable                     | PAr index         | 4-Pyridoxic acid/pyridoxine ratio |
|------------------------------|-------------------|-----------------------------------|
| Age                          | 0.191 (p = 0.035) | 0.212 (p = 0.021)                 |
| Creatinine                   | 0.187 (p = 0.040) | NS                                |
| Cystatin -C                  | 0.215 (p = 0.017) | NS                                |
| CRP                          | 0.285 (p = 0.001) | 0.151 (p = 0.101)                 |
| Risk score from Yu et al (1) | 0.173 (p = 0.057) | 0.299 (p = 0.001)                 |
| PROCAM score                 | NS                | 0.193 (p = 0.035)                 |
| sVCAM-1                      | NS                | 0.383 (p < 0.001 )                |

The correlation coefficients are according to Spearman test. Only significant correlations or those with a trend are shown. PAr index = 4-pyridoxic acid/ (pyridoxal + pyridoxal-5`phosphate) ratio. No correlations were observed between PAr or 4-Pyridoxic acid/pyridoxine ratio and other risk factors such as systolic and diastolic blood pressure or blood lipids.

**Supplemental Table 4. Plasma vitamin B6 forms in healthy controls (n = 34) compared to patients with diabetes and low vascular risk (n=61)**

|                                   | Patients with<br>diabetes and |                  |        |
|-----------------------------------|-------------------------------|------------------|--------|
|                                   | low risk                      | Control subjects |        |
| <i>Vitamin B6 forms</i>           | N=61                          | N = 34           | p      |
| 4-Pyridoxic acid, nmol/L          | 31.9 (15.0)                   | 29.7 (40.6)      | 0.649  |
| Pyridoxine, nmol/L                | 38.1 (127.8)                  | 13.6 (5.4)       | 0.462  |
| Pyridoxal, nmol/L                 | 13.9 (5.7)                    | 25.0 (18.0)      | <0.001 |
| Pyridoxal-5`phosphate, nmol/L     | 29.3 (16.2)                   | 55.9 (72.3)      | 0.007  |
| Pyridoxamine, nmol/L              | 1.8 (1.0)                     | 3.2 (13.9)       | 0.476  |
| Pyridoxamine phosphate, nmol/L    | 10.0 (5.1)                    | 5.5 (11.5)       | 0.010  |
| 4-Pyridoxic acid/pyridoxine ratio | 3.9 (3.2)                     | 2.2 (2.5)        | 0.009  |
| PAr index                         | 0.84 (0.06)                   | 0.37 (0.12)      | <0.001 |

Data are mean (SD).

P values are according to ANOVA test (log transformed values).

PAr index = 4-pyridoxic acid/ (pyridoxal + pyridoxal-5`phosphate) ratio.

## Reference

1. Yu D, Cai Y, Graffy J, Holman D, Zhao Z, Simmons D. Development and external validation of risk scores for cardiovascular hospitalisation and rehospitalisation in diabetes patients. *J Clin Endocrinol Metab* 2018; 103:1122-9.
